# Supplementary material for: Synthesis of a New Glycoconjugate with Di-ᴅ-Psicose Anhydride Structure
Source: MDPI journal article supplement (doi:10.3390/ijms232112827), 2022-10-24
Supplement: s1 [file s1]

## **Supplementary Data**

### **Synthesis of a new glycoconjugate with di-*D*-psicose anhydride structure**

Young Sung Jung, Hyoun-Geun Kim, Min-Cheol Lim, Ji-Su Park, Soonok Sa, and Miyoung Yoo\*

\*Corresponding author: Tel.: +82-63-219-9342; Fax.: +82-63-219-9280; E-mail addresses: myyoo@kfri.re.kr.

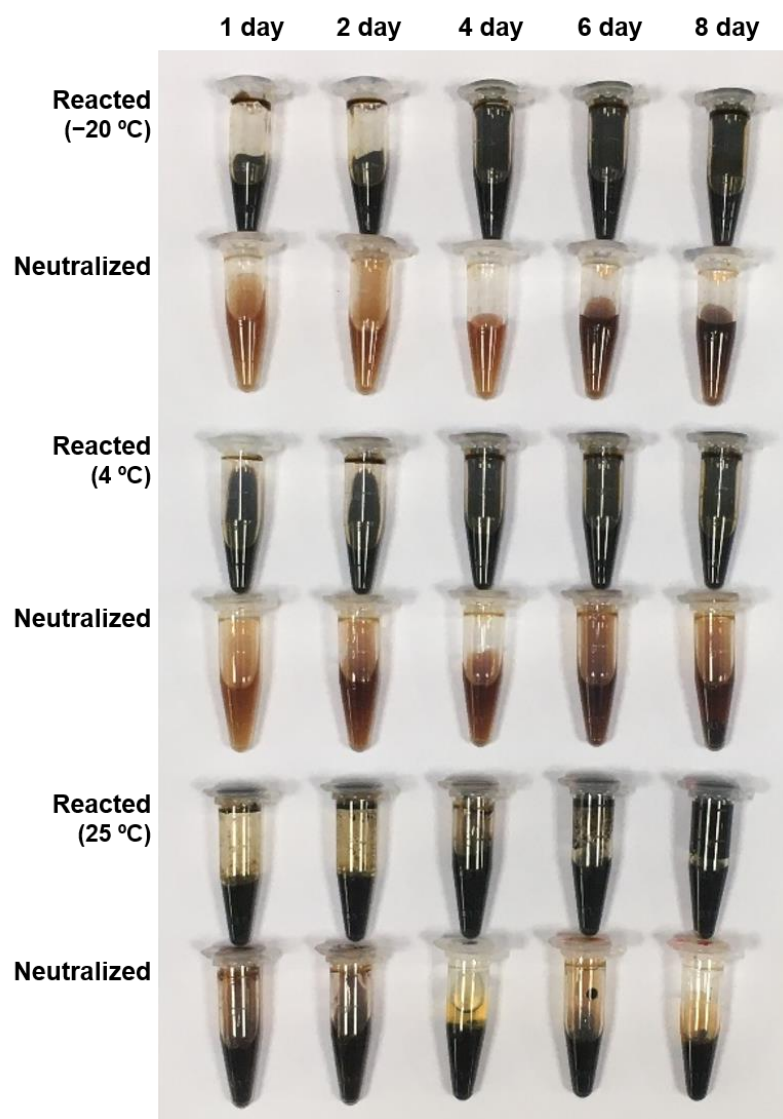

**Figure S1.** Caramelization of *D*-psicose with time and temperature.

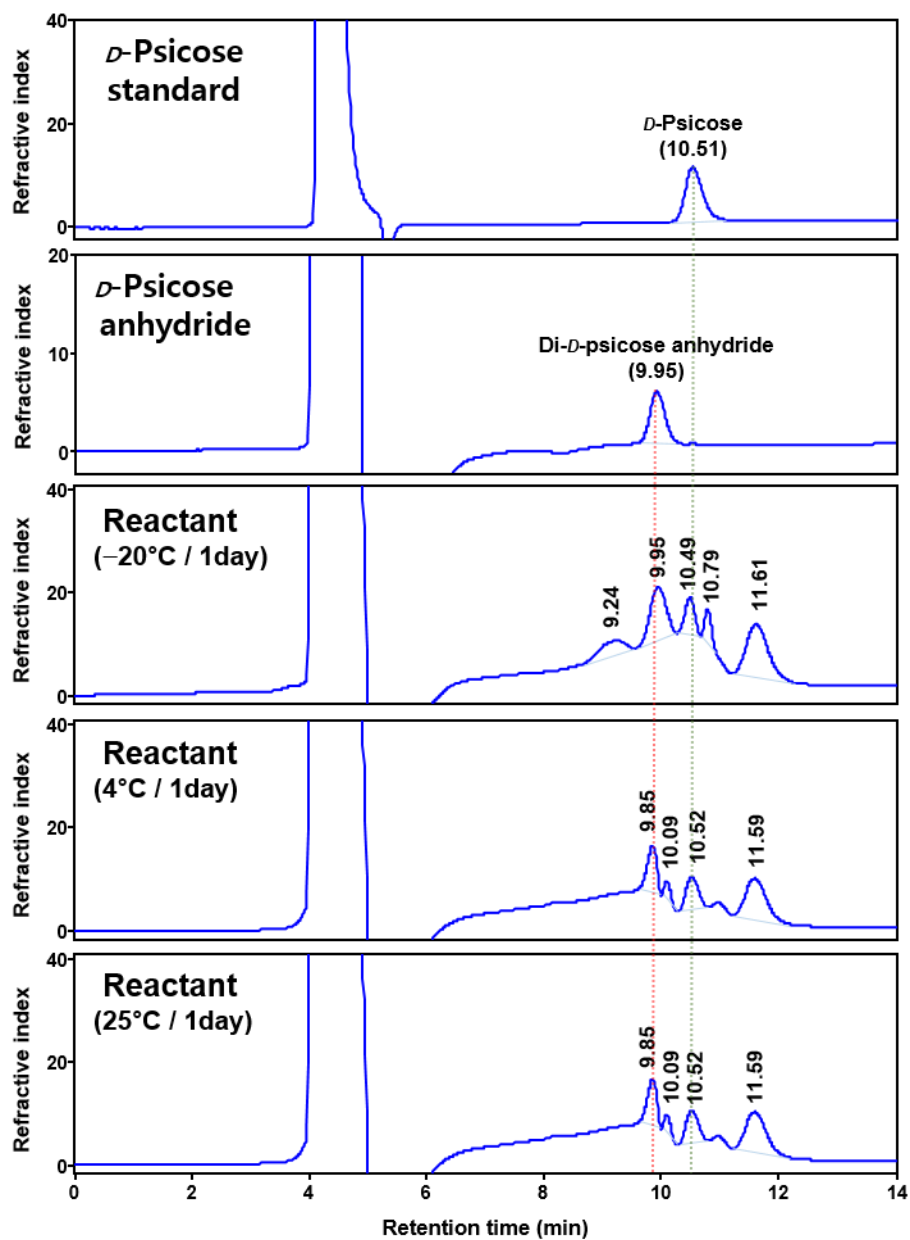

**Figure S2.** Composition of di-*D*-psicose anhydride (DPA), *D*-psicose, and other peaks with reaction temperature for one day under hydrochloric acid condition.

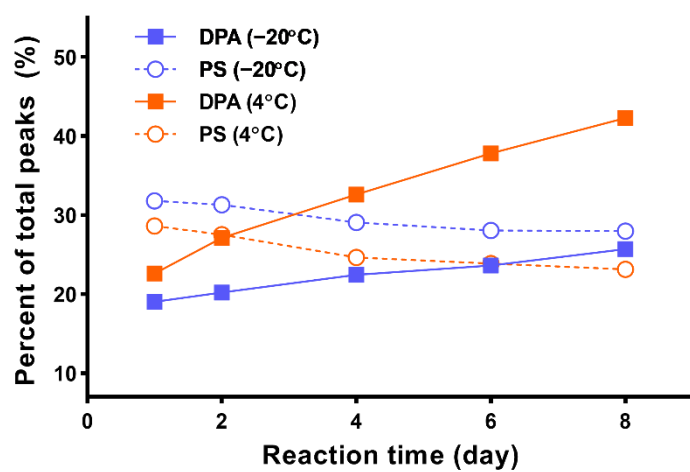

**Figure S3.** Ratio of di-*D*-psicose anhydride (DPA) production to *D*-psicose residual with reaction time and temperature under hydrochloric acid conditions.

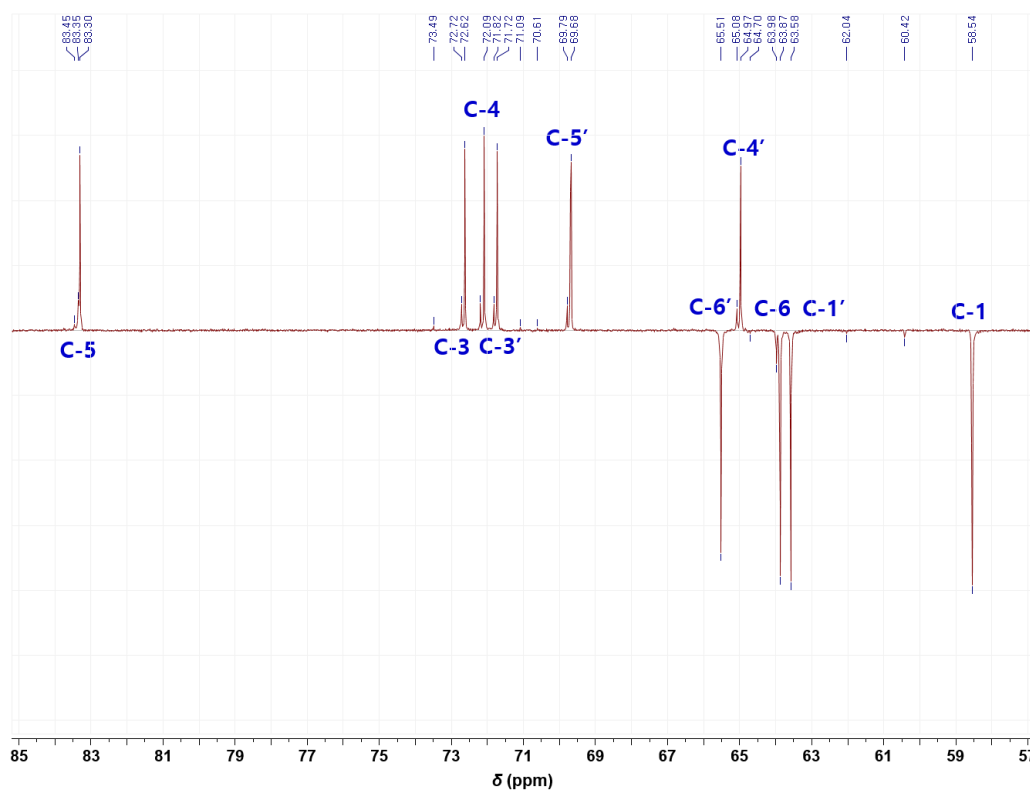

**Figure S4.** Distortionless enhancement by polarization transfer  $^{135}\text{NMR}$  spectrum of di-*D*-psicose anhydride.

**A**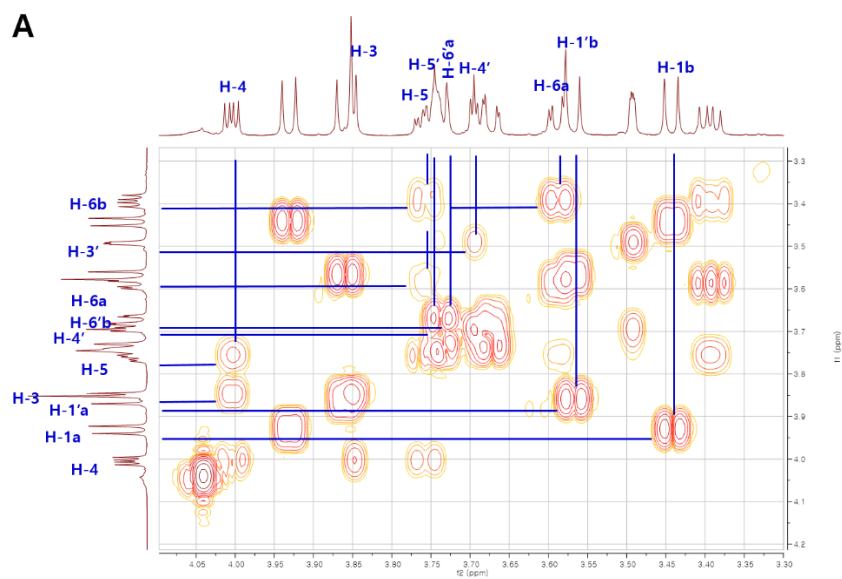**B**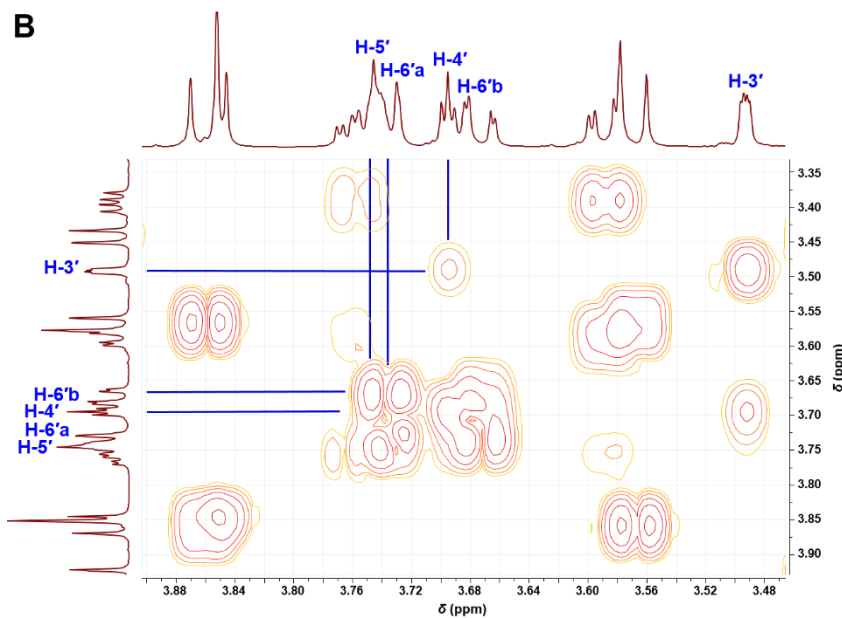

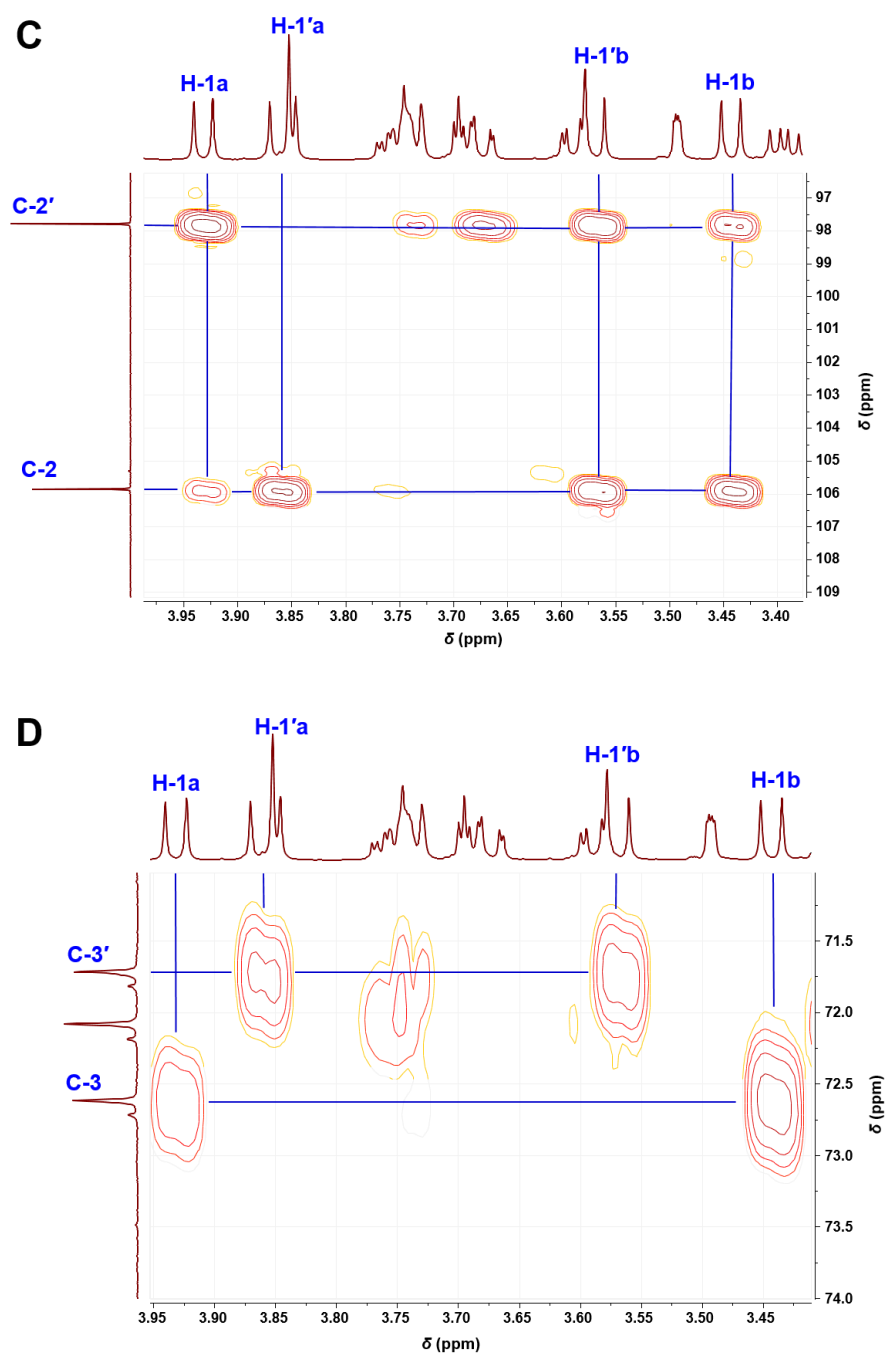

**Figure S5.** Correlated spectroscopy NMR spectra of di-*D*-psicose anhydride. Full scale (A) and enlarged scale (B). Correlation for C-2 and C-2' (C) and correlation for C-3 and C-3' (D).

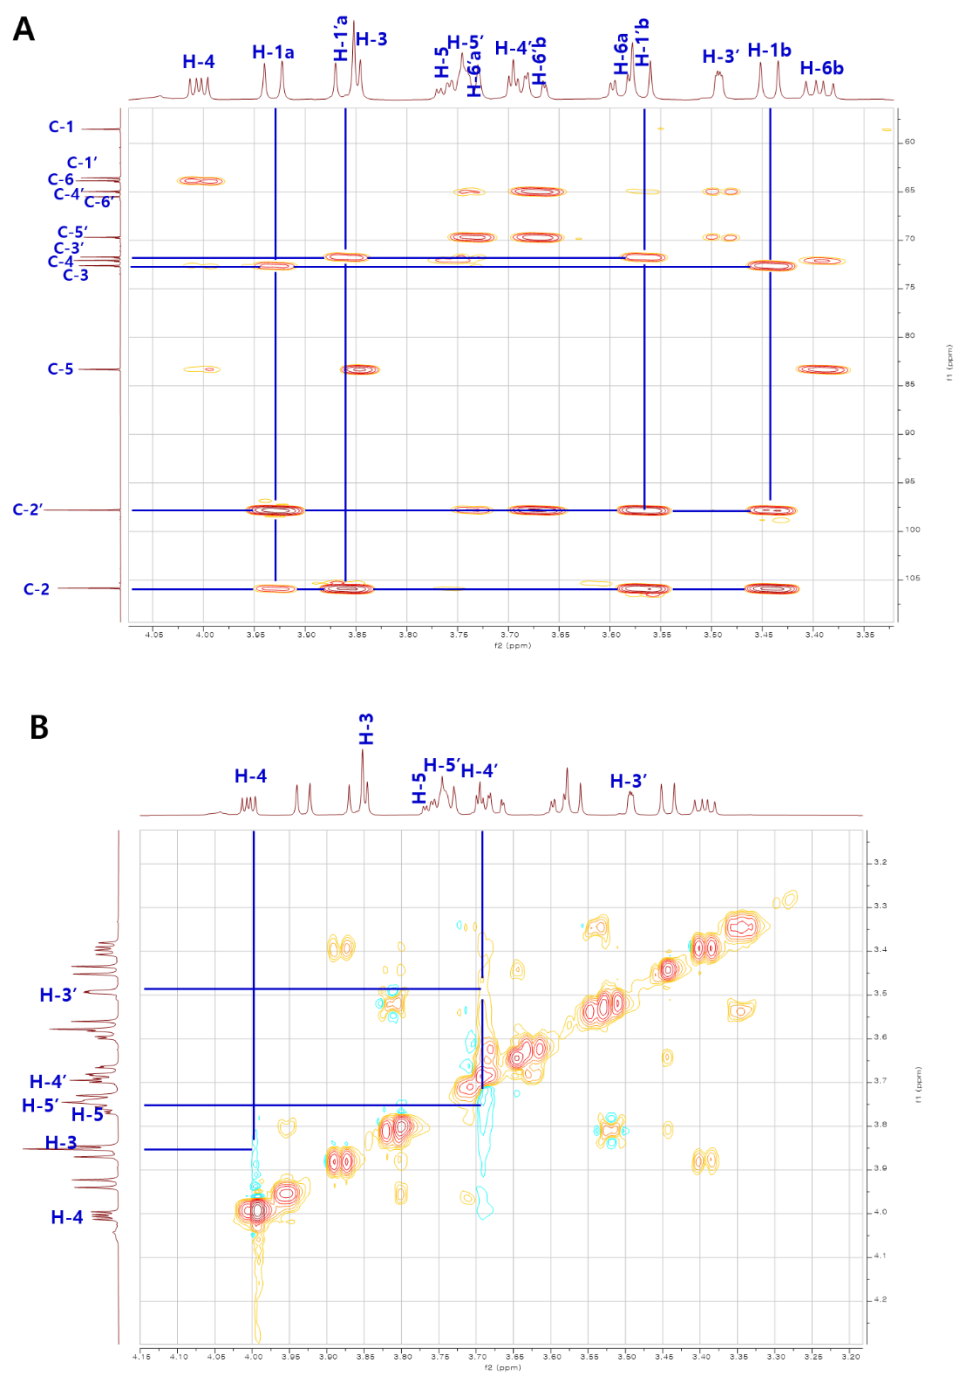

**Figure S6.** Heteronuclear multiple bond correlation (A) and nuclear overhauser enhancement spectroscopy (B) NMR spectra of di-*D*-psicose anhydride.
